# Supplementary material for: Effects of Different Forms of Sensorimotor Training on Postural Control and Functional Status in Patients with Chronic Low Back Pain
Source: MDPI journal article supplement (doi:10.3390/jpm13040634), 2023-04-05
Supplement: s1 [file s1]

Article

# Effects of different forms of sensorimotor training on postural control and functional status in patients with chronic low back pain

Alex Rüger<sup>1,2</sup>, Kevin Laudner<sup>3</sup>, Karl-Stefan Delank<sup>1</sup>, René Schwesig<sup>1</sup> and Anke Steinmetz<sup>4\*</sup>

<sup>1</sup> Department of Orthopedic and Trauma Surgery, Martin-Luther-University Halle-Wittenberg, 06120 Halle, Germany; alex.rueger@uk-halle.de

<sup>2</sup> Department of Ophthalmology, Martin-Luther-University Halle-Wittenberg, 06120 Halle, Germany

<sup>3</sup> Department of Health Sciences, University of Colorado Colorado Springs, CO 80918, USA; klaudner@uccs.edu

<sup>4</sup> University Medicine Greifswald, Physical and Rehabilitation Medicine, Department of Trauma, Reconstructive Surgery and Rehabilitation Medicine, 17475 Greifswald, Germany; anke.steinmetz@med.uni-greifswald.de

\*Correspondence: anke.steinmetz@med.uni-greifswald.de

**Abstract:** The aim of this study was to compare three sensorimotor training forms in patients with chronic low back pain to determine their effects in the reduction of pain-related impairment and changes in posturography. Over two weeks, during multimodal pain therapy (MMPT) period, six sessions of either sensorimotor physiotherapy, training on the Galileo® or Posturomed® (n = 25 per group) were performed. A significant reduction in pain-related impairment after the intervention phase was shown across all groups (time effect:  $p < 0.001$ ;  $\eta_p^2 = 0.415$ ). There was no change in postural stability (time effect:  $p = 0.666$ ;  $\eta_p^2 = 0.003$ ), but there was a significant improvement in the peripheral vestibular system (time effect:  $p = 0.014$ ;  $\eta_p^2 = 0.081$ ). An interaction effect was calculated for the fore-foot-hindfoot ratio ( $p = 0.014$ ;  $0.111$ ). Only the Posturomed® group showed an improvement in anterior-posterior weight distribution (heel load: 47% vs. 49%). These findings suggest that these forms of sensorimotor training in the context of a multimodal pain therapy are suitable for reducing pain-related impairment. Posturography demonstrated stimulation of a subsystem, but no improvement in postural stability.

**Keywords:** Galileo®; Posturomed®; chronic, low back pain; sensory, motor, physiotherapy; rehabilitation

**Citation:** Rüger, A.; Laudner, K.; Delank, K.-S.; Schwesig, R.; Steinmetz, A. Effects of Different Forms of Sensorimotor Training on Postural Control and Functional Status in Patients with Chronic Low Back Pain. *J. Pers. Med.* **2023**, *13*, x. <https://doi.org/10.3390/xxxxx>

Academic Editor(s): Markus Gesslein, Eduard Kurz

Received: 13 March 2023

Revised: 28 March 2023

Accepted: 3 April 2023

Published: date

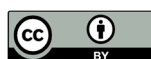

**Copyright:** © 2023 by the authors. Licensee MDPI, Basel, Switzerland. This article is an open access article distributed under the terms and conditions of the Creative Commons Attribution (CC BY) license (<https://creativecommons.org/licenses/by/4.0/>).

## Supplementary Materials:

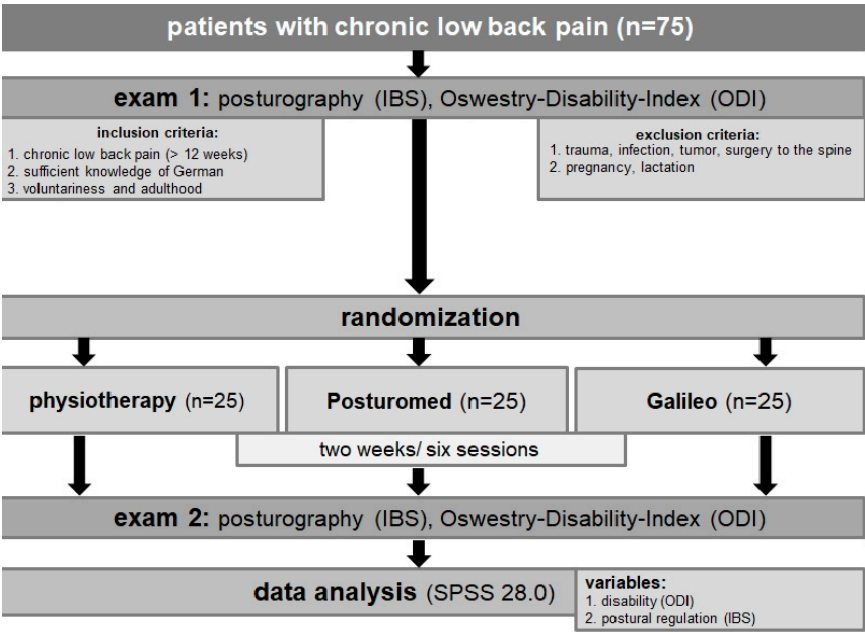

Figure S1: Flow-Chart to the study

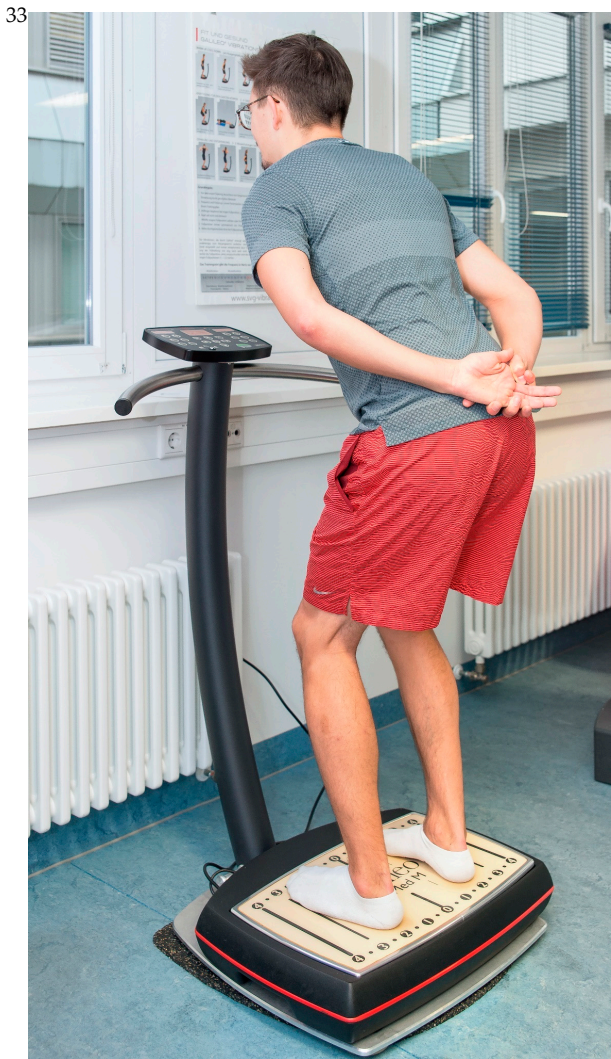

Figure S2: Galileo®

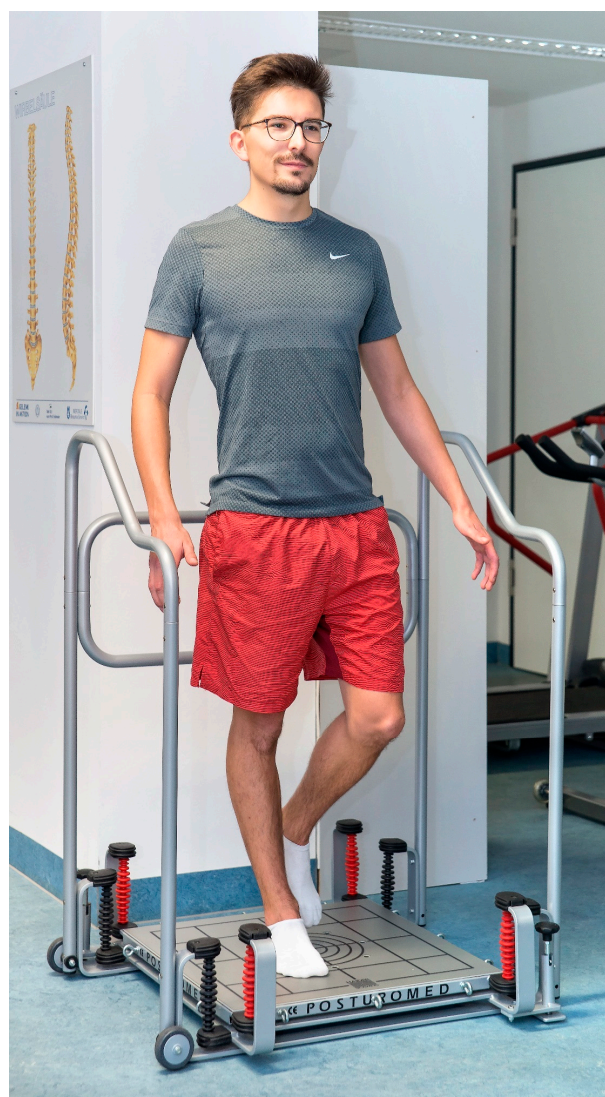

**Figure S3:** Posturomed®

**Table S1:** IBS parameters [30,31]

| Category           | Parameter                       | Interpretation/Explanation                                                                     |
|--------------------|---------------------------------|------------------------------------------------------------------------------------------------|
| Process parameters | Frequency band 1 (0.03–0.1 Hz)  | Visual and nigrostriatal system                                                                |
|                    | Frequency band 2-4 (0.1–0.5 Hz) | Peripheral-vestibular system                                                                   |
|                    | Frequency band 5-6 (0.5–1.0 Hz) | Somatosensory system                                                                           |
|                    | Frequency band 7-8 (>1.0 Hz)    | Cerebellar system                                                                              |
| Product parameters | Stability indicator (ST)        | The stability indicator (ST) was determined as the root mean square of the differences between |

|  |                                  |                                                                                                                                                                                                       |
|--|----------------------------------|-------------------------------------------------------------------------------------------------------------------------------------------------------------------------------------------------------|
|  |                                  | pressure distributions on the plates and describes the postural stability. The larger the stability indicator, the higher the instability of the person is to be rated.                               |
|  | Weight distribution index (WDI): | The WDI calculates the standard deviation in the weight distribution on the plates assuming that 25% of the body weight is distributed evenly across the four plates.                                 |
|  | Synchronization (Synch.)         | Six values that describe the relationship of vibration patterns between plates calculated as a scalar product: 1000—complete coactivity; -1000—complete compensation; 0—no coactivity or compensation |
|  | Forefoot–hindfoot ratio (Heel):  | Percentage of load distribution between the forefoot and hindfoot with an emphasis on heel loading.                                                                                                   |
|  | Left–right ratio (Left)          | Percentage of load distribution between the left and right feet with an emphasis on left side loading.                                                                                                |

**Table S2:** Exercise program in physiotherapy

| Surface                | Task                                                                                                                       | Duration/<br>Rest/Reps |
|------------------------|----------------------------------------------------------------------------------------------------------------------------|------------------------|
| <a href="#">Stable</a> | 1. Stand upright on both feet, eyes open.                                                                                  | 10 s/20 s/3            |
|                        | 2. Stand upright on both feet, eyes closed.                                                                                | 10 s/20 s/3            |
|                        | 3. Stand upright on one leg, eyes open.                                                                                    | 10 s/20 s/3            |
|                        | 4. Stand upright on one leg, eyes closed.                                                                                  | 10 s/20 s/3            |
|                        | 5. Stand upright on both feet, eyes open, pass ball around body at waist height (clockwise and counter-clockwise).         | 10 s/20 s/3            |
|                        | 6. Stand upright on both feet, eyes closed, pass the ball around the body at waist level (clockwise and counterclockwise). | 10 s/20 s/3            |

|                                        |                                                                                                                        |             |
|----------------------------------------|------------------------------------------------------------------------------------------------------------------------|-------------|
|                                        | 7. Stand upright on one leg, eyes open, pass the ball around the body at waist level (clockwise and counterclockwise). | 10 s/20 s/3 |
|                                        | 8. Stand upright on both feet, eyes open, throw the ball up (about 30cm) and catch it.                                 | 8 s/20 s/3  |
|                                        | 9. Stand upright on one leg, eyes open, throw the ball up (about 30cm) and catch it.                                   | 8 s/20 s/3  |
| Unstable<br>(on a<br>gymnastic<br>mat) | 10. Stand upright on both feet, eyes open.                                                                             | 10 s/20 s/3 |
|                                        | 11. Stand upright on both feet, eyes closed.                                                                           | 10 s/20 s/3 |
|                                        | 12. Stand upright on one leg, eyes open.                                                                               | 10 s/20 s/3 |
|                                        | 13. Stand upright on one leg, eyes closed.                                                                             | 10 s/20 s/3 |
|                                        | 14. Stand upright on both feet, eyes open, pass ball around body at waist height (clockwise and counterclockwise).     | 10 s/20 s/3 |
|                                        | 15. Stand upright on one leg, eyes open, pass ball around body at waist height (clockwise and counterclockwise).       | 10 s/20 s/3 |
|                                        | 16. Stand upright on both feet, eyes open, throw the ball up (about 30cm) and catch it.                                | 8 s/20 s/3  |

**Table S3:** Exercise program in Galileo®-Group

| Exercise Tasks                 | Position                                                                                                                                                                               | Duration/Frequency/<br>Rest |
|--------------------------------|----------------------------------------------------------------------------------------------------------------------------------------------------------------------------------------|-----------------------------|
| 1. Warm up and Acclimatization | Stand upright in the middle of the vibration plate, feet about shoulder-width apart, flexion in the hip/knee joint about 45°, extension of the ankle joint about 45° (basic position). | 60 s/5 Hz/30 s              |
| 2. Muscle tension              | Stand upright, move pelvis ventrally.                                                                                                                                                  | 30 s/18 Hz/30 s             |
| 3. Muscle tension              | Basic position.                                                                                                                                                                        | 30 s/15-25 Hz/30 s          |
| 4. Muscle tension              | Lifting the heels.                                                                                                                                                                     | 30 s/15-25 Hz/60 s          |
| 5. Muscle tension              | Arms crossed behind the head, pelvic movement in the plane from dorsal to ventral.                                                                                                     | 45 s/15-25 Hz/60 s          |
| 6. Back Coordination           | Arms crossed behind the head, pelvic movement in the plane from dorsal to ventral.                                                                                                     | 60 s/5-7 Hz/60 s            |
| 7. Relaxation                  | Basic position, support via the bracket.                                                                                                                                               | 30 s/10 Hz/30 s             |

**Table S4:** Exercise program in Posturomed®-Group

43

| Level | Locks       | Exercise                                            | Execution                                                                                                                                                        | Number of throws |
|-------|-------------|-----------------------------------------------------|------------------------------------------------------------------------------------------------------------------------------------------------------------------|------------------|
| 1     | Both closed | Step on the spot, one-legged stand.                 | Raise your feet alternately by approx. 10-15 cm in an upright position, hold every 3 changes in one-legged position for approx. 2 s.                             | 0                |
| 2     | Both closed | Throwing and catching in the medial sagittal plane. | Same as in level 1, with one-legged stand, but throw a ball (diameter 20cm, weight 100g) 1-5 times at a height of approx. 60-80 cm and catch it with both hands. | 1-5              |
| 3     | Both closed | Throwing and catching after rotation.               | Same as in level 2, but rotate the leg during the one-legged stand 10-15° in the pelvic/shoulder line, then throw and catch the ball 2-6x ascending.             | 2-6              |
| 4     | One opened  | Step on the spot, one-legged stand.                 | Raise your feet alternately by approx. 10-15 cm in an upright position, hold every 3 changes in one-legged position for approx. 2 s.                             | 0                |
| 5     | One opened  | Throwing and catching in the medial sagittal plane  | Same as in level 4, but with the one-legged stand, throw a ball 1-5x at a height of approx. 60-80 cm and catch it with both hands.                               | 1-5              |
| 6     | One opened  | Throwing and catching after rotation.               | Same as in level 5, but rotate the leg during the one-legged stand 10-15° in the pelvic/shoulder line, then throw and catch the ball 2-6x ascending.             | 2-6              |
| 7     | Both opened | Step on the spot, one-legged stand.                 | Raise your feet alternately by approx. 10-15 cm in an upright position, hold every 3 changes in one-legged position for approx. 2 s.                             | 0                |
| 8     | Both opened | Throwing and catching in the medial sagittal plane  | Same as in level 7, but when standing on one leg throw a ball up 1-5x at a height of approx. 60-80 cm and catch it with both hands.                              | 1-5              |

---

|   |             |                                     |                                                                                                                                                      |     |
|---|-------------|-------------------------------------|------------------------------------------------------------------------------------------------------------------------------------------------------|-----|
| 9 | Both opened | Step on the spot, one-legged stand. | Same as in level 8, but rotate the leg during the one-legged stand 10-15° in the pelvis/shoulder line, then throw and catch the ball 2-6x ascending. | 2-6 |
|---|-------------|-------------------------------------|------------------------------------------------------------------------------------------------------------------------------------------------------|-----|

44

45

46

47

48

49

50

51

52
